# Supplementary material for: Pancreatic alpha cell glucagon–liver FGF21 axis regulates beta cell regeneration in a mouse model of type 2 diabetes
Source: Diabetologia. 2022 Nov 4;66(3):535–50. doi: 10.1007/s00125-022-05822-2 (PMC9892158; doi:10.1007/s00125-022-05822-2)
Supplement: Supplementary file 1 — (PDF 939 kb) [file 125_2022_5822_MOESM1_ESM.pdf]

## Supplemental methods

### Animal experiments

All animal experimental procedures were conducted at Peking University Health Science Center, and approved by the Institutional Animal Care and Use Committee. All the animals were maintained on a 12-h light/dark cycle with free access to food and water. Eight-week-old male *db/db* mice (GemPharmatech Co. Ltd., Nanjing, China) were used as a mouse model of type 2 diabetes. The littermate male *db/m* mice were included as normal controls.  $n = 5$  mice per group.

The genetically modified mice were as follows: Systemic *Fgf21*-knockout (*Fgf21<sup>-/-</sup>*) mice were established by Cyagen Bioscience Company (Suzhou, China) using CRISPR-Cas9 technique to knockout exons 1-3. The littermate wild-type (WT) mice were used as controls. Alb-cre mice (cre expression in liver cells; the Jackson Laboratory, Barr Harbor, ME, USA) and *Fgf21* Flox mice (the Jackson Laboratory) were kindly gifted by Prof. Lirui Wang from China Pharmaceutical University (Nanjing, China), and crossed to generate hepatocyte-specific *Fgf21*-knockout (*Fgf21<sup>Hep-/-</sup>*) mice [1]. The littermate *Fgf21* Flox mice were used as controls.

To generate high fat diet (HFD) + streptozotocin (STZ)-induced mouse model of type 2 diabetes, 5-week-old male C57BL/6N (Vital River Animal Center, Beijing, China) or genetically modified mice were fed with HFD (fat 60%, carbohydrate 20% and protein 20%; Research Diets, New Brunswick, NJ, USA) for 3–4 months, and then were given 75 mg/kg STZ (Sigma-Aldrich, St. Louis, MO, USA) intraperitoneally. Diabetic condition was defined if the fasting blood glucose level was  $\geq 11.1$  mmol/l for two

consecutive times. The mice without diabetic condition were omitted from the study. Mice were randomised into groups having similar distributions based on their body weight and blood glucose level.

To determine the effects of GCGR mAb on beta cell regeneration, *db/db* mice or HFD+STZ-induced mouse models of type 2 diabetes in C57BL/6N mice were treated for 6 weeks *via* weekly intraperitoneal injection of REMD 2.59 (a human antagonistic GCGR mAb, 5 mg/kg; REMD Biotherapeutics, Camarillo, CA, USA), or human IgG (5 mg/kg, as control). There were 5 mice in each group. To clarify the involvement of FGF21 in GCGR mAb-induced beta cell regeneration, HFD+STZ-induced mouse models of type 2 diabetes in *Fgf21*<sup>-/-</sup> mice and WT mice were treated with 5 mg/kg REMD 2.59 or human IgG for 6 weeks. There were 6 mice in each group. Besides, *db/db* mice were divided into four groups: 1) control group: treated with human IgG and rabbit IgG; 2) GCGR mAb group: injected with REMD 2.59 and rabbit IgG; 3) FGF21 neutralizing antibody (nAb) group: treated with FGF21 nAb (Antibody & Immunoassay Services, Hong Kong, China) and human IgG; 4) GCGR mAb + FGF21 nAb group: injected with REMD 2.59 and FGF21 nAb. REMD 2.59 and human IgG were intraperitoneally injected weekly at a dose of 5 mg/kg, while FGF21 nAb and rabbit IgG were intraperitoneally injected daily at a dose of 6 µg/day for 3 weeks. There were 6 mice in each group. To determine the effects of liver-derived FGF21 in GCGR mAb-induced beta cell regeneration, HFD+STZ-induced mouse models of type 2 diabetes in *Fgf21*<sup>Hep-/-</sup> mice and Flox littermates were treated with 5 mg/kg REMD 2.59 or human IgG for 6 weeks. There were 3 mice in each Flox group, and 5 mice in each *Fgf21*<sup>Hep-/-</sup> group. For

proliferation detection, mice were treated with 1 mg/ml 5-bromo-2'-deoxyuridine (BrdU, Sigma-Aldrich) *via* drinking water for 7 days before being sacrificed.

The high affinity (a higher affinity for GCGR than the endogenous ligand glucagon) and strong specificity (highly specific antagonistic activity against GCGR, without inhibitory effect on glucagon-like peptide-1 receptor and other receptors with similar structures) of GCGR mAb has been proved previously [2-4]. The neutralizing ability of FGF21 nAb has been reported previously [5].

### **Immunofluorescent staining and quantification**

Pancreases were fixed with 10% (*vol/vol*) neutral-buffered formalin and embedded in paraffin, and 5- $\mu$ m-thick sections were prepared. For immunofluorescence, the sections were incubated with primary antibodies at 4°C overnight and secondary antibodies for 1 h at room temperature, followed by staining with DAPI. All primary and secondary antibodies were diluted in antibody dilution buffer (Tris-HCl buffer, BSA, sodium azide; Zhongshan Biotechnology, Beijing, China). Images were captured under Leica TCS SP8 confocal fluorescence microscope (Leica Microsystems, Wetzlar, Germany) or an automatic digital slide scanner (Pannoramic MIDI, 3D HISTECH, Budapest, Hungary).

The primary antibodies were as follows: rabbit polyclonal anti-glucagon (1:800; Cell Signaling Technology, Boston, MA, USA; RRID: AB\_659831), mouse monoclonal anti-insulin (1:800; Sigma-Aldrich; RRID: AB\_260137), rabbit monoclonal anti-insulin (1:600; Abcam, Cambridge, UK; RRID: AB\_2716761), rabbit polyclonal anti-BrdU (1:200; Abcam; RRID: AB\_2813902), mouse monoclonal anti-proliferating cell nuclear antigen (1:1000; Cell Signaling Technology; RRID: AB\_2160343). The secondary

antibodies were as follows: Alexa Fluor 488-conjugated AffiniPure goat polyclonal anti-rabbit IgG (H+L) (RRID: AB\_2338046) and Alexa Fluor 594-conjugated AffiniPure goat polyclonal anti-mouse IgG (H+L) (RRID: AB\_2338871) (both at 1:800; Jackson ImmunoResearch Laboratories, Philadelphia, PA, USA). Before testing, positive control and negative control were used to verify the antibodies.

For cell quantification in the immunofluorescent staining, 3 to 5 equally spaced sections (which covered the entire pancreas) per pancreas with 3 to 6 mice per group were imaged, and the spacing between the two adjacent sections was 200  $\mu$ m. The islet number per section, and the alpha cell number and beta cell number per islet were counted manually with the positive staining of glucagon and insulin. The islet area (the glucagon-positive and insulin-positive region) was analysed by Fiji software (National Institutes of Health, Bethesda, MD, USA) [6]. For panoramic scanning, fluorescence was imaged using an automatic digital slide scanner (Pannoramic MIDI).

### **Primary mouse islet isolation and culture**

Primary islets were isolated from chow-diet C57BL/6N mice aged 8-10 weeks as previously reported [7-9]. Briefly, the pancreas was perfused by collagenase V (Sigma-Aldrich), and individual islets were handpicked to near 100% purity under a dissecting microscope. The islets were cultured for 24 h before treatment in the RPMI 1640 medium (Invitrogen, Carlsbad, CA, USA) supplemented with 10% (*vol/vol*) foetal bovine serum (FBS; HyClone, Logan, UT, USA), 2 mmol/l GlutMax (Thermo Fisher Scientific, Waltham, MA, USA), 1 mmol/l sodium pyruvate (Thermo Fisher Scientific), and 1% (*vol/vol*) penicillin-streptomycin (Thermo Fisher Scientific).

### **Mouse beta cell line culture**

The mouse pancreatic beta cell line Min6 cells, kindly gifted by Prof. Yiming Mu from the General Hospital of the People's Liberation Army (Beijing, China), were cultured in Dulbecco's modified eagle medium (DMEM, 25 mmol/l glucose; Invitrogen) supplemented with 15% (*vol/vol*) FBS, 2 mmol/l GlutMax and 55  $\mu$ mol/l  $\beta$ -mercaptoethanol (Thermo Fisher Scientific). Min6 cells were verified to be of mouse origin and negative for inter-species contamination from rat or human. Mycoplasma was tested as negative using Mycoplasma PCR detection kit (Beyotime Biotechnology, Shanghai, China).

### **Primary mouse hepatocyte isolation and culture**

Eight-week-old male C57BL/6N mice on chow-diet were treated for 6 weeks *via* intraperitoneal administration of GCGR mAb (5 mg/kg) or human IgG (5 mg/kg, as control) once a week. There were 3 mice in each group. Primary hepatocytes were isolated by nonrecirculating collagenase perfusion through the portal vein as previously reported [5] The hepatocytes were plated on 6-well plates which were coated with rat collagen type I (Sigma-Aldrich), and were then cultured in RPMI 1640 medium containing 10% (*vol/vol*) FBS for 6 h before further co-culture. In the co-culture system, the primary hepatocytes from each mouse were used independently in the experiments.

### **Co-culture of beta cell line or primary islets with primary hepatocytes**

The co-culture system was established by the transwell chamber with 3  $\mu$ m-pore size (Corning, New York, NY, USA). The primary mouse hepatocytes were plated on the lower chamber. The Min6 cells or primary mouse islets were plated on the upper

chamber. The co-culture systems were incubated for 24 h with or without FGF21 nAb (10 µg/ml; Antibody & Immunoassay Services), and the beta cell line or primary islets were collected for further analysis.

### **Conditional culture of beta cell line or primary islets with mouse plasma**

Eight-week-old male C57BL/6N mice on chow-diet were treated for 6 weeks *via* intraperitoneal injection of GCGR mAb (5 mg/kg) or human IgG (5 mg/kg, as control) once per week. There were 6 mice in each group. Plasma was collected after a 12-h fast before sacrifice, and was stored at −80°C. In the conditional culture system, plasma from two mice in the same treatment group was pooled together. There were 3 batches of plasma in each group for the plasma-conditional culture experiments.

Min6 cells or primary mouse islets were cultured with 10% (*vol/vol*) mouse plasma and 90% culture medium with or without FGF21 nAb (10 µg/ml), and the beta cell line or primary islets were collected for further analysis.

### **RNA extraction, reverse transcription and quantitative RT-PCR**

Total RNA was extracted with Trizol reagent (Thermo Fisher Scientific) and reversely transcribed to cDNA using a RevertAid First Strand cDNA Synthesis kit (Thermo Fisher Scientific). The quantitative RT-PCR was performed using iQ SYBR Green Supermix (Toyobo Co., Ltd., Osaka, Japan) on a QuantStudio 5 Real-Time PCR System (Thermo Fisher Scientific). Relative quantification for gene expression was calculated using the  $2^{-\Delta\Delta CT}$  method, which was normalized to the internal reference, *Gapdh*. The primer sequences were summarized in ESM Table 1.

## Protein extraction and western blot analysis

Total proteins from liver tissues were obtained using radioimmunoprecipitation assay lysis buffer, which contained protease inhibitor and phosphatase inhibitor (all from Applygen Technologies, Beijing, China). The denatured proteins (approximately 30 µg) were separated by 12% (*wt/vol*) SDS-PAGE electrophoresis and transferred to a nitrocellulose membrane. The membranes were incubated overnight at 4°C with the primary antibodies (both at 1:1000 dilution): rabbit anti-FGF21 (Abcam; RRID: AB\_2629460) and mouse anti-GAPDH (Zhongshan Biotechnology, Beijing, China; RRID: AB\_2107448). The primary antibodies were diluted in TBST with 5% BSA. Before testing, positive control and negative control were used to verify the antibodies. After three washes, the blots were incubated for 1 h with RDye 800CW-conjugated goat anti-rabbit IgG or goat anti-mouse IgG (both at 1:10,000 dilutions; LICOR Biosciences, Lincoln, NE, USA). The secondary antibodies were diluted in TBST. Protein bands were visualized with an Odyssey 290 Infrared Imaging System (LICOR Biosciences). GAPDH was used as a loading control.

## References

- [1] Wang L, Mazagova M, Pan C, et al. (2019) YIPF6 controls sorting of FGF21 into COPII vesicles and promotes obesity. *Proc Natl Acad Sci U S A* 116(30):15184-15193. <https://doi.org/10.1073/pnas.1904360116>
- [2] Yan H, Gu W, Yang J, et al. (2009) Fully human monoclonal antibodies antagonizing the glucagon receptor improve glucose homeostasis in mice and monkeys. *J Pharmacol Exp Ther* 329(1):102-111. <https://doi.org/10.1124/jpet.108.147009>
- [3] Wang MY, Yan H, Shi Z, et al. (2015) Glucagon receptor antibody completely suppresses type 1 diabetes phenotype without insulin by disrupting a novel diabetogenic pathway. *Proc Natl Acad Sci U S A* 112(8):2503-2508. <https://doi.org/10.1073/pnas.1424934112>
- [4] Gu W, Yan H, Winters KA, et al. (2009) Long-term inhibition of the glucagon receptor with a monoclonal antibody in mice causes sustained improvement in glycemic control, with reversible alpha-cell hyperplasia and hyperglucagonemia. *J Pharmacol Exp Ther* 331(3):871-881. <https://doi.org/10.1124/jpet.109.157685>

- [5] Liu J, Yang K, Yang J, et al. (2019) Liver-derived fibroblast growth factor 21 mediates effects of glucagon-like peptide-1 in attenuating hepatic glucose output. *EBioMedicine* 41:73-84. <https://doi.org/10.1016/j.ebiom.2019.02.037>
- [6] Schindelin J, Arganda-Carreras I, Frise E, et al. (2012) Fiji: an open-source platform for biological-image analysis. *Nat Methods* 9(7):676-682. <https://doi.org/10.1038/nmeth.2019>
- [7] Wang L, Liu Y, Yang J, et al. (2014) GLP-1 analog liraglutide enhances proinsulin processing in pancreatic beta-cells via a PKA-dependent pathway. *Endocrinology* 155(10):3817-3828. <https://doi.org/10.1210/en.2014-1218>
- [8] Wei R, Cui X, Feng J, et al. (2020) Dapagliflozin promotes beta cell regeneration by inducing pancreatic endocrine cell phenotype conversion in type 2 diabetic mice. *Metabolism* 111:154324. <https://doi.org/10.1016/j.metabol.2020.154324>
- [9] Zmuda EJ, Powell CA, Hai T (2011) A method for murine islet isolation and subcapsular kidney transplantation. *J Vis Exp* 50(50):e2096. <https://doi.org/10.3791/2096>

# Supplemental tables

**ESM Table 1.** Quantitative RT-PCR primers used for mRNA expression analysis.

| Gene symbol  | Gene name                                     | Species | Gene ID | Primer sequences (5'-3')                             | Tm (°C) | Product length (bp) |
|--------------|-----------------------------------------------|---------|---------|------------------------------------------------------|---------|---------------------|
| <i>Fgf21</i> | fibroblast growth factor 21                   | Mouse   | 56636   | F: CTGCTGGGGGTCTACCAAG<br>R: CTGCGCCTACCACTGTTCC     | 62      | 154                 |
| <i>Gcg</i>   | proglucagon                                   | Mouse   | 14526   | F: TTCATCTCATCAGGGTCCTC<br>R: GCTTATAATGCTGGTGCAAG   | 60      | 95                  |
| <i>Ins1</i>  | insulin 1                                     | Mouse   | 16333   | F: TAGTGACCAGCTATAATCAGAG<br>R: ACGCCAAGGTCTGAAGGTCC | 62      | 289                 |
| <i>Ins2</i>  | insulin 2                                     | Mouse   | 16334   | F: CCCTGCTGGCCCTGCTCTT<br>R: AGGTCTGAAGGTCACCTGCT    | 60      | 213                 |
| <i>Pcsk1</i> | proprotein convertase subtilisin/kexin type 1 | Mouse   | 18548   | F: AGTTGGAGGCATAAGAATGCTG<br>R: GCCTTCTGGGCTAGTCTGC  | 60      | 159                 |
| <i>Pcsk2</i> | proprotein convertase subtilisin/kexin type 2 | Mouse   | 18549   | F: GTGTGATGGTTTTTGCCTCTG<br>R: GGGAGCTTTCGGA CTCAA   | 59      | 130                 |
| <i>Pdx1</i>  | pancreatic and duodenal homeobox 1            | Mouse   | 18609   | F: AGGAAAACAAGAGGACCCGT<br>R: CTTTATGCGACGGTTTTGGA   | 60      | 151                 |
| <i>Gapdh</i> | glyceraldehyde-3-phosphate dehydrogenase      | Mouse   | 14433   | F: TGCACCACCAACTGCTTAGC<br>R: GGCATGGACTGTGGTCATGAG  | 60      | 87                  |

Abbreviations: Tm, temperature; bp, base pair.

**ESM Table 2.** Cytokine array screening for the change of cytokines in the plasma of streptozotocin-induced diabetic mice treated with GCGR mAb or human IgG control.

| Well number | Cytokine                                                    | Abbreviation | Gene ID | Alternative nomenclature                                      | Mean densitometry unit of control group | Mean densitometry unit of GCGR mAb group | Fold Change (GCGR mAb /control) |
|-------------|-------------------------------------------------------------|--------------|---------|---------------------------------------------------------------|-----------------------------------------|------------------------------------------|---------------------------------|
| J7-J8       | serine (or cysteine) peptidase inhibitor, clade E, member 1 | SERPINE1     | 18787   | PAI1; PAI-1; Planh1                                           | 11428.01                                | 24049.57                                 | 2.104440756                     |
| I21-I22     | resistin                                                    | RETN         | 57264   | ADSF; Rstn; Xcp4; Fizz3                                       | 11823.00                                | 18440.19                                 | 1.559687896                     |
| I3-I4       | serum amyloid P-component                                   | APCS         | 20219   | Sap                                                           | 12656.31                                | 17980.65                                 | 1.420686598                     |
| J9-J10      | serine (or cysteine) peptidase inhibitor, clade F, member 1 | SERPINF1     | 20317   | Pedf; Sdf3; EPC-1; Pedfl; AI195227                            | 11887.66                                | 16299.18                                 | 1.371100789                     |
| H3-H4       | leukemia inhibitory factor                                  | LIF          | 16878   | LIF                                                           | 6659.36                                 | 8600.33                                  | 1.291464946                     |
| J13-J14     | hepatitis A virus cellular receptor 1                       | HAVCR1       | 171283  | Tim1; KIM-1; TIM-1; Timd1; AI503787                           | 6561.97                                 | 8214.45                                  | 1.251826814                     |
| C21-C22     | chemokine (C-X-C motif) ligand 2                            | CXCL2        | 20310   | GROb; Gro2; Mip2; Scyb; MIP-2; Scyb2; MIP-2a; Mgsa-b; CINC-2a | 2766.73                                 | 3412.46                                  | 1.233391043                     |
| I13-I14     | proprotein convertase subtilisin/kexin type 9               | PCSK9        | 100102  | FH3; PC9; Narc1; HCHOLA3; AI415265; AI747682                  | 31941.32                                | 38946.23                                 | 1.219305589                     |
| E11-E12     | growth differentiation                                      | GDF15        | 23886   | SBF; MIC-1; NAG-1                                             | 4839.93                                 | 5853.34                                  | 1.209385260                     |

|         |                                           |        |       |                                                                |          |          |             |
|---------|-------------------------------------------|--------|-------|----------------------------------------------------------------|----------|----------|-------------|
|         | factor 15                                 |        |       |                                                                |          |          |             |
| E3-E4   | fibroblast growth factor 21               | FGF21  | 56636 | FGF21                                                          | 5666.88  | 6841.32  | 1.207246315 |
| I7-I8   | periostin, osteoblast specific factor     | POSTN  | 50706 | PN; PLF; Osf2; OSF-2; AI747096; A630052E07Rik                  | 22466.36 | 26951.05 | 1.199618007 |
| E9-E10  | colony stimulating factor 3 (granulocyte) | CSF3   | 12985 | Csfg; G-CSF; MGI-IG                                            | 3621.30  | 4315.32  | 1.191649408 |
| H1-H2   | leptin                                    | LEP    | 16846 | ob; obese                                                      | 3747.06  | 4457.20  | 1.189519250 |
| J15-J16 | tumour necrosis factor                    | TNF    | 21926 | DIF; Tnfa; TNF-a; TNFSF2; Tnlg1f; Tnfsf1a; TNFalpha; TNF-alpha | 4682.96  | 5464.39  | 1.166866683 |
| J17-J18 | vascular cell adhesion molecule 1         | VCAM1  | 22329 | CD106; Vcam-1                                                  | 25392.08 | 29592.20 | 1.165410632 |
| C19-C20 | chemokine (C-X-C motif) ligand 1          | CXCL1  | 14825 | KC; Fsp; N51; gro; Gro1; Mgsa; Scyb1                           | 2803.30  | 3261.32  | 1.163386009 |
| E1-E2   | fibroblast growth factor 1                | FGF1   | 14164 | Fam; Fgfa; Dffrx; FGF-1                                        | 4465.73  | 5132.13  | 1.149225323 |
| I11-I12 | prolactin family 2, subfamily c, member 2 | PRL2C2 | 18811 | Plf; Ghd2; Plf1; MRP-1; PLF-1                                  | 6635.77  | 7521.13  | 1.133422346 |
| J11-J12 | thrombopoietin                            | THPO   | 21832 | MI; Tpo; Mgdff; Mpllg                                          | 6378.26  | 7031.95  | 1.102487199 |
| C11-C12 | haemolytic complement                     | HC     | 15139 | C5; He; C5a                                                    | 10436.60 | 11460.12 | 1.098070253 |
| G11-G12 | interleukin 17A                           | IL17A  | 16171 | Il17; Ctla8; IL-17; Ctla-8; IL-17A                             | 1555.35  | 1703.99  | 1.095566914 |
| D23-D24 | alpha-2-HS-                               | AHSG   | 11625 | AHSG                                                           | 24817.50 | 26804.29 | 1.080056009 |

|         |                                                    |        |       |                                                                            |          |          |             |
|---------|----------------------------------------------------|--------|-------|----------------------------------------------------------------------------|----------|----------|-------------|
|         | glycoprotein                                       |        |       |                                                                            |          |          |             |
| G5-G6   | interleukin 12b                                    | IL12B  | 16160 | p40; Il-12b; Il12p40;<br>Il-12p40                                          | 8953.97  | 9636.45  | 1.076220939 |
| H5-H6   | lipocalin 2                                        | LCN2   | 16819 | NRL; 24p3; Sip24;<br>AW212229                                              | 12943.37 | 13924.66 | 1.075814104 |
| J5-J6   | selectin, platelet                                 | SELP   | 20344 | Grmp; CD62P;<br>LECAM3; PADGEM;<br>GMP-140                                 | 38135.61 | 40392.06 | 1.059169107 |
| F23-F24 | interleukin 7                                      | IL7    | 16196 | IL-7; hlb368;<br>A630026I06Rik                                             | 8178.23  | 8651.86  | 1.057913509 |
| G9-G10  | interleukin 15                                     | IL15   | 16168 | IL-15; AI503618                                                            | 5169.18  | 5445.73  | 1.053499781 |
| F13-F14 | interleukin 2                                      | IL2    | 16183 | IL-2                                                                       | 1387.59  | 1458.82  | 1.051333607 |
| F3-F4   | insulin-like growth<br>factor binding<br>protein 5 | IGFBP5 | 16011 | IGFBP-5; AI256729;<br>AW208790; IGFBP-<br>5P                               | 23111.23 | 24052.79 | 1.040740367 |
| C9-C10  | coagulation factor<br>III                          | F3     | 14066 | TF; Cf3; Cf-3; CD142;<br>AA409063                                          | 6082.81  | 6301.52  | 1.035955422 |
| E7-E8   | growth arrest<br>specific 6                        | GAS6   | 14456 | Gas-6                                                                      | 17539.62 | 18169.97 | 1.035938635 |
| B21-B22 | CD40 antigen                                       | CD40   | 21939 | IGM; p50; Bp50;<br>GP39; IMD3; TRAP;<br>HIGM1; T-BAM;<br>Tnfrsf5; AI326936 | 3777.17  | 3898.94  | 1.032238422 |
| E5-E6   | FMS-like tyrosine<br>kinase 3 ligand               | FLT3L  | 14256 | Ly72L; Flt3lg                                                              | 8513.32  | 8783.01  | 1.031678593 |
| F11-F12 | interleukin 1<br>receptor antagonist               | IL1RN  | 16181 | IL-1Ra;<br>F630041P17Rik                                                   | 4416.38  | 4486.56  | 1.015890843 |
| J3-J4   | selectin, endothelial<br>cell                      | SELE   | 20339 | Elam; CD62E;<br>ELAM-1; LECAM2;<br>E-selectin                              | 37638.89 | 38109.17 | 1.012494524 |

|         |                                               |        |       |                                                                 |          |          |             |
|---------|-----------------------------------------------|--------|-------|-----------------------------------------------------------------|----------|----------|-------------|
| F9-F10  | interleukin 1 beta                            | IL1B   | 16176 | Il-1b; IL-1beta                                                 | 3308.33  | 3334.40  | 1.007880109 |
| I9-I10  | delta like non-canonical Notch ligand 1       | DLK1   | 13386 | FA1; ZOG; pG2; Dlk1; Peg9; SCP1; DLK-1; Ly107; pref-1; AW742678 | 9114.18  | 9182.08  | 1.007449930 |
| G3-G4   | interleukin 11                                | IL11   | 16156 | IL-11                                                           | 6635.19  | 6665.17  | 1.004518333 |
| D11-D12 | cystatin C                                    | CST3   | 13010 | CysC                                                            | 18545.61 | 18623.80 | 1.004216092 |
| I1-I2   | platelet derived growth factor, B polypeptide | PDGFB  | 18591 | Sis; PDGF-B                                                     | 8982.63  | 8996.82  | 1.001579716 |
| G1-G2   | interleukin 10                                | IL10   | 16153 | CSIF; IL-10                                                     | 5167.65  | 5171.06  | 1.000659874 |
| G21-G22 | interleukin 33                                | IL33   | 77125 | IL-33; Il1f11; NF-HEV; 9230117N10Rik                            | 7247.93  | 7209.70  | 0.994725391 |
| D3-D4   | chemokine (C-X-C motif) ligand 10             | CXCL10 | 15945 | C7; IP10; CRG-2; INP10; IP-10; Ifi10; mob-1; Scyb10; gIP-10     | 5733.99  | 5694.86  | 0.993175782 |
| H7-H8   | chemokine (C-X-C motif) ligand 5              | CXCL5  | 20311 | LIX; Cxcl6; GCP-2; Scyb5; Scyb6; ENA-78; AMCF-II                | 38472.09 | 38186.13 | 0.992567079 |
| H13-H14 | matrix metalloproteinase 3                    | MMP3   | 17392 | SL-1; SLN1; Str1; EMS-2; MMP-3; SLN-1; STR-1; Stmy1             | 21932.82 | 21750.25 | 0.991675945 |
| G13-G14 | interleukin 22                                | IL22   | 50929 | IL-22; Iltif; IL-22a; ILTIFa                                    | 2539.29  | 2517.06  | 0.991245584 |
| G7-G8   | interleukin 13                                | IL13   | 16163 | IL-13                                                           | 5303.85  | 5237.21  | 0.987435542 |
| I19-I20 | regenerating islet-derived 3 gamma            | REG3G  | 19695 | AI449515; REG-3-gamma; reg III-gamma                            | 46121.56 | 45314.27 | 0.982496472 |
| E13-E14 | colony stimulating factor 2                   | CSF2   | 12981 | CSF; Csfgm; GMCSF; Gm-CSf; MGI-IGM                              | 2668.75  | 2618.90  | 0.981320843 |

|         |                                                 |        |       |                                                                    |          |          |             |
|---------|-------------------------------------------------|--------|-------|--------------------------------------------------------------------|----------|----------|-------------|
|         | (granulocyte-macrophage)                        |        |       |                                                                    |          |          |             |
| A3-A4   | adiponectin, C1Q and collagen domain containing | ADIPOQ | 11450 | Ad; APN; Acde; apM1; 30kDa; GBP28; adipo; Acrp30                   | 36987.34 | 36115.06 | 0.976416796 |
| D1-D2   | chemokine (C-X-C motif) ligand 9                | CXCL9  | 17329 | CMK; Mig; MuMIG; Scyb9; crg-10; BB139920                           | 4800.80  | 4687.46  | 0.976391435 |
| H19-H20 | secreted phosphoprotein 1                       | SPP1   | 20750 | OP; 2AR; Bsp; Eta; Opn; Ric; BNSP; BSPI; Opnl; Apl-1; ETA-1; Spp-1 | 42296.95 | 41172.68 | 0.973419596 |
| G15-G16 | interleukin 23, alpha subunit p19               | IL23A  | 83430 | p19; IL-23                                                         | 3635.95  | 3523.22  | 0.968995723 |
| H9-H10  | colony stimulating factor 1 (macrophage)        | CSF1   | 12977 | op; Csfm; MCSF; C87615                                             | 18783.68 | 18193.03 | 0.968555150 |
| E23-E24 | insulin-like growth factor binding protein 2    | IGFBP2 | 16008 | IBP-2; Igfbp-2; AI255832; mIGFBP-2                                 | 37602.54 | 36305.67 | 0.965511106 |
| B11-B12 | chemokine (C-C motif) ligand 19                 | CCL19  | 24047 | ELC; CKb11; MIP3B; Scya19; exodus-3                                | 7027.74  | 6748.33  | 0.960241842 |
| C17-C18 | chemokine (C-X3-C motif) ligand 1               | CX3CL1 | 20312 | CX3C; Cxc3; Scyd1; ABCD-3; AB030188; AI848747; D8Bwg0439e          | 4746.28  | 4554.69  | 0.959633650 |
| H11-H12 | matrix metalloproteinase 2                      | MMP2   | 17390 | GelA; Clg4a; MMP-2                                                 | 26087.12 | 24876.35 | 0.953587441 |
| F5-F6   | insulin-like growth factor binding              | IGFBP6 | 16012 | IGFBP-6                                                            | 34947.89 | 33219.43 | 0.950541792 |

|         |                                              |         |       |                                             |          |          |             |
|---------|----------------------------------------------|---------|-------|---------------------------------------------|----------|----------|-------------|
|         | protein 6                                    |         |       |                                             |          |          |             |
| B9-B10  | chemokine (C-C motif) ligand 17              | CCL17   | 20295 | Tarc; Abcd-2; Scya17; Scya17l               | 6687.42  | 6329.60  | 0.946493566 |
| D21-D22 | collagen, type XVIII, alpha 1                | COL18A1 | 12822 | COL18A1                                     | 28000.46 | 26484.05 | 0.945843390 |
| B7-B8   | chemokine (C-C motif) ligand 12              | CCL12   | 20293 | MCP-5; Scya12                               | 9246.34  | 8704.57  | 0.941407086 |
| D17-D18 | epidermal growth factor                      | EGF     | 13645 | AI790464                                    | 12539.46 | 11801.07 | 0.941114689 |
| I17-I18 | retinol binding protein 4, plasma            | RBP4    | 19662 | Rbp-4                                       | 21441.18 | 20024.05 | 0.933906156 |
| F19-F20 | interleukin 5                                | IL5     | 16191 | IL-5                                        | 5616.17  | 5202.50  | 0.926343042 |
| C3-C4   | CD160 antigen                                | CD160   | 54215 | By55; AU045688                              | 7211.99  | 6664.45  | 0.924079207 |
| F17-F18 | interleukin 4                                | IL4     | 16189 | IL-4; BSF-1                                 | 13389.83 | 12285.20 | 0.917502313 |
| F15-F16 | interleukin 3                                | IL3     | 16187 | BPA; PSF; HCGF; Il-3; MCGF; Csfmu           | 2311.54  | 2111.45  | 0.913438660 |
| B3-B4   | chemokine (C-C motif) ligand 6               | CCL6    | 20305 | c10; MRP-1; Scya6                           | 42889.04 | 39065.96 | 0.910861143 |
| F1-F2   | insulin-like growth factor binding protein 3 | IGFBP3  | 16009 | IGFBP-3; IGgfbp3; AI649005                  | 28297.03 | 25764.30 | 0.910494847 |
| E15-E16 | hepatocyte growth factor                     | HGF     | 15234 | SF; NK1; NK2; HGF/SF; SF/HGF; C230052L06Rik | 6299.68  | 5628.78  | 0.893502527 |
| E21-E22 | insulin-like growth factor binding protein 1 | IGFBP1  | 16006 | COL18A1                                     | 47978.89 | 42737.01 | 0.890746118 |
| D13-D14 | dickkopf WNT signalling pathway              | DKK1    | 13380 | mdkk-1                                      | 8109.74  | 7216.88  | 0.889902759 |

|         |                                         |             |               |                                                                           |          |          |             |
|---------|-----------------------------------------|-------------|---------------|---------------------------------------------------------------------------|----------|----------|-------------|
|         | inhibitor 1                             |             |               |                                                                           |          |          |             |
| F7-F8   | interleukin 1 alpha                     | IL1A        | 16175         | IL-1a                                                                     | 8672.47  | 7708.17  | 0.888809071 |
| C15-C16 | C-reactive protein, pentraxin-related   | CRP         | 12944         | AI255847                                                                  | 36540.32 | 32357.66 | 0.885533022 |
| A7-A8   | angiopoietin 1                          | ANGPT1      | 11600         | 1110046O21Rik, Ang-1, Ang1                                                | 14813.86 | 13059.26 | 0.881556866 |
| B5-B6   | chemokine (C-C motif) ligand 11         | CCL11       | 20292         | Scya11; eotaxin                                                           | 21486.93 | 18851.16 | 0.877331475 |
| H23-H24 | thymidine phosphorylase                 | TYMP        | 72962         | TP; Ecgf1; PDECGF; Pdgfec; PD-ECGF; 2900072D10Rik                         | 6551.09  | 5737.65  | 0.875831350 |
| A5-A6   | amphiregulin                            | AREG        | 11839         | AR; Mcub; Sdgf                                                            | 6832.27  | 5948.53  | 0.870652067 |
| G19-G20 | interferon lambda 2/interferon lambda 3 | IFNL2/IFNL3 | 330496/338374 | Il28a; IL-28A; EG330496/Il28; IFL-1; Il28b; IL-28B; INF-alpha; INF-lambda | 14044.74 | 12073.83 | 0.859669172 |
| D15-D16 | dipeptidyl peptidase 4                  | DPP4        | 13482         | Cd26; THAM; Dpp-4                                                         | 25860.33 | 22213.13 | 0.858965450 |
| E17-E18 | intercellular adhesion molecule 1       | ICAM1       | 15894         | CD54; Ly-47; Icam-1; MALA-2                                               | 34642.84 | 29738.95 | 0.858444342 |
| J19-J20 | vascular endothelial growth factor A    | VEGFA       | 22339         | Vpf; VEGF                                                                 | 9283.90  | 7964.81  | 0.857916393 |
| G17-G18 | interleukin 27                          | IL27        | 246779        | p28; Il30; IL-27; IL-27p28                                                | 6848.99  | 5873.07  | 0.857508917 |
| A9-A10  | angiopoietin 2                          | ANGPT2      | 11601         | Ang2; Agpt2; Ang-2                                                        | 38192.44 | 32509.84 | 0.851211392 |
| C13-C14 | complement factor D (adipsin)           | CFD         | 11537         | DF; Adn                                                                   | 36482.80 | 30994.52 | 0.849565275 |

|         |                                                                  |         |       |                                                                                                      |          |          |             |
|---------|------------------------------------------------------------------|---------|-------|------------------------------------------------------------------------------------------------------|----------|----------|-------------|
| C7-C8   | chitinase-like 1                                                 | CHIL1   | 12654 | Gp39; Brp39; Chi3l1;<br>AW208766                                                                     | 25513.82 | 21649.64 | 0.848545612 |
| I5-I6   | pentraxin related<br>gene                                        | PTX3    | 19288 | TSG-14; AI607804                                                                                     | 31311.75 | 26498.12 | 0.846267615 |
| C5-C6   | retinoic acid<br>receptor responder<br>(tazarotene<br>induced) 2 | RARRES2 | 71660 | AI303516;<br>0610007L05Rik                                                                           | 25505.20 | 21486.73 | 0.842445070 |
| D9-D10  | chemokine (C-X-C<br>motif) ligand 16                             | CXCL16  | 66102 | SR-PSOX; Zmynd15;<br>AV290116;<br>BB024863;<br>CXCL16v1;<br>CXCL16v2;<br>b2b498Clo;<br>0910001K24Rik | 8648.92  | 7263.31  | 0.839793870 |
| F21-F22 | interleukin 6                                                    | IL6     | 16193 | IL6                                                                                                  | 6477.72  | 5368.17  | 0.828712880 |
| D5-D6   | chemokine (C-X-C<br>motif) ligand 11                             | CXCL11  | 56066 | Ip9; H174; Itac; b-R1;<br>Cxc11; I-tac; Scyb11;<br>Scyb9b; betaR1                                    | 7568.12  | 6253.36  | 0.826276539 |
| J21-J22 | WNT1 inducible<br>signalling pathway<br>protein 1                | WISP1   | 22402 | CCN4; Elm1;<br>AW146261                                                                              | 7935.29  | 6437.17  | 0.811207908 |
| A11-A12 | angiopoietin-like 3                                              | ANGPTL3 | 30924 | hypl                                                                                                 | 37572.13 | 30097.20 | 0.801051205 |
| B17-B18 | chemokine (C-C<br>motif) ligand 22                               | CCL22   | 20299 | ABCD-1, DCBCK,<br>MDC, Scya22                                                                        | 5084.97  | 4069.82  | 0.800362637 |
| E19-E20 | interferon gamma                                                 | IFNG    | 15978 | Ifg; IFN-g                                                                                           | 7040.24  | 5616.46  | 0.797765417 |
| I15-I16 | advanced<br>glycosylation end<br>product-specific                | AGER    | 11596 | RAGE                                                                                                 | 12722.44 | 10073.44 | 0.791785224 |

|         |                                                                           |           |       |                                                                     |          |          |             |
|---------|---------------------------------------------------------------------------|-----------|-------|---------------------------------------------------------------------|----------|----------|-------------|
|         | receptor                                                                  |           |       |                                                                     |          |          |             |
| H17-H18 | myeloperoxidase                                                           | MPO       | 17523 | mKIAA4033                                                           | 27304.61 | 21600.17 | 0.791081433 |
| A21-A22 | chemokine (C-C motif) ligand 5                                            | CCL5      | 20304 | SISd; Scya5; RANTES; TCP228; MuRantes                               | 3611.75  | 2834.35  | 0.784758081 |
| D19-D20 | endoglin                                                                  | ENG       | 13805 | Endo; CD105; AI528660; AI662476; S-endoglin                         | 15270.24 | 11977.15 | 0.784345891 |
| B19-B20 | CD14 antigen                                                              | CD14      | 12475 | CD14                                                                | 8314.68  | 6322.47  | 0.760398476 |
| H15-H16 | Matrix metalloproteinase 9                                                | MMP9      | 17395 | Clg4b; Gel B; MMP-9; B/MMP9; AW743869; pro-MMP-9                    | 11181.92 | 8495.85  | 0.759784545 |
| G23-G24 | low density lipoprotein receptor                                          | LDLR      | 16835 | Hlb301                                                              | 22569.80 | 16590.17 | 0.735060568 |
| H21-H22 | tumour necrosis factor receptor superfamily, member 11b (osteoprotegerin) | TNFRSF11B | 18383 | Opg; TR1; OCIF                                                      | 8659.18  | 5867.37  | 0.677589564 |
| A13-A14 | tumour necrosis factor (ligand) superfamily, member 13b                   | TNFSF13B  | 24099 | BAFF; BLyS; TALL1; THANK; zTNF4; TALL-1; Tnlg7a; TNFSF20; D8Ert387e | 35076.33 | 23752.45 | 0.677164629 |
| D7-D8   | chemokine (C-X-C motif) ligand 13                                         | CXCL13    | 55985 | BLC; Angie; BCA-1; BLR1L; ANGIE2; Scyb13; 4631412M08Rik             | 42384.47 | 28195.58 | 0.665233752 |

|         |                                                               |           |             |                                                                                                                   |          |          |             |
|---------|---------------------------------------------------------------|-----------|-------------|-------------------------------------------------------------------------------------------------------------------|----------|----------|-------------|
| B15-B16 | chemokine (C-C motif) ligand 21A (serine)                     | CCL21A    | 18829       | ALP; SLC; plt; CKb9; Tca4; 6Ckine; Scya21; 6CKBAC2; SCYA21a; Scya21b; AW987545                                    | 35270.61 | 22752.22 | 0.645075886 |
| A19-A20 | chemokine (C-C motif) ligand 3/chemokine (C-C motif) ligand 4 | CCL3/CCL4 | 20302/20303 | Mip1a; Scya3; G0S19-1; AI323804; MIP1-(a); LD78alpha; MIP-1alpha; MIP1-alpha/Act-2; Mip1b; Scya4; MIP-1B; AT744.1 | 3664.53  | 2216.49  | 0.604849735 |
| A15-A16 | CD93 antigen                                                  | CD93      | 17064       | Ly68; AA4.1; C1qr1; C1qrp; AA145088; AW555904; 6030404G09Rik                                                      | 40555.09 | 24024.00 | 0.592379403 |
| A17-A18 | chemokine (C-C motif) ligand 2                                | CCL2      | 20296       | JE; HC11; MCAF; MCP1; MCP-1; Scya2; Sigje; SMC-CF; AI323594                                                       | 4111.74  | 2367.32  | 0.575746521 |
| B13-B14 | chemokine (C-C motif) ligand 20                               | CCL20     | 20297       | CKb4; LARC; ST38; MIP3A; MIP-3A; Scya20; MIP-3(a); exodus-1                                                       | 34588.73 | 8286.37  | 0.239568495 |

## Supplemental figures

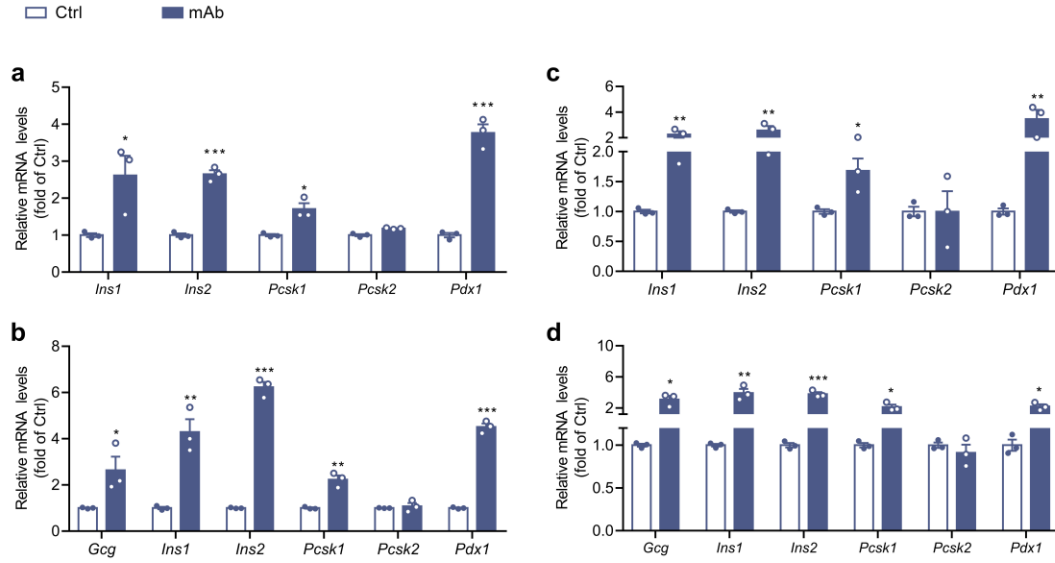

**ESM Fig. 1** Regulation of beta cell identity in mouse beta cell line Min6 cells and primary mouse islets by exposure to plasma or hepatocytes from the GCGR mAb-treated non-diabetic C57BL/6N mice. **(a, b)** Relative gene expression levels in Min6 cells **(a)** and primary mouse islets **(b)** after exposed to plasma-conditional culture for 24 h. **(c, d)** Relative gene expression levels in Min6 cells **(c)** and primary mouse islets **(d)** after exposed to hepatocyte co-culture systems for 24 h. Data represent 3 independent experiments and are expressed as mean  $\pm$  SEM. \* $P < 0.05$ , \*\* $P < 0.01$ , \*\*\* $P < 0.001$  vs control (Student's  $t$  test). Ctrl, control group

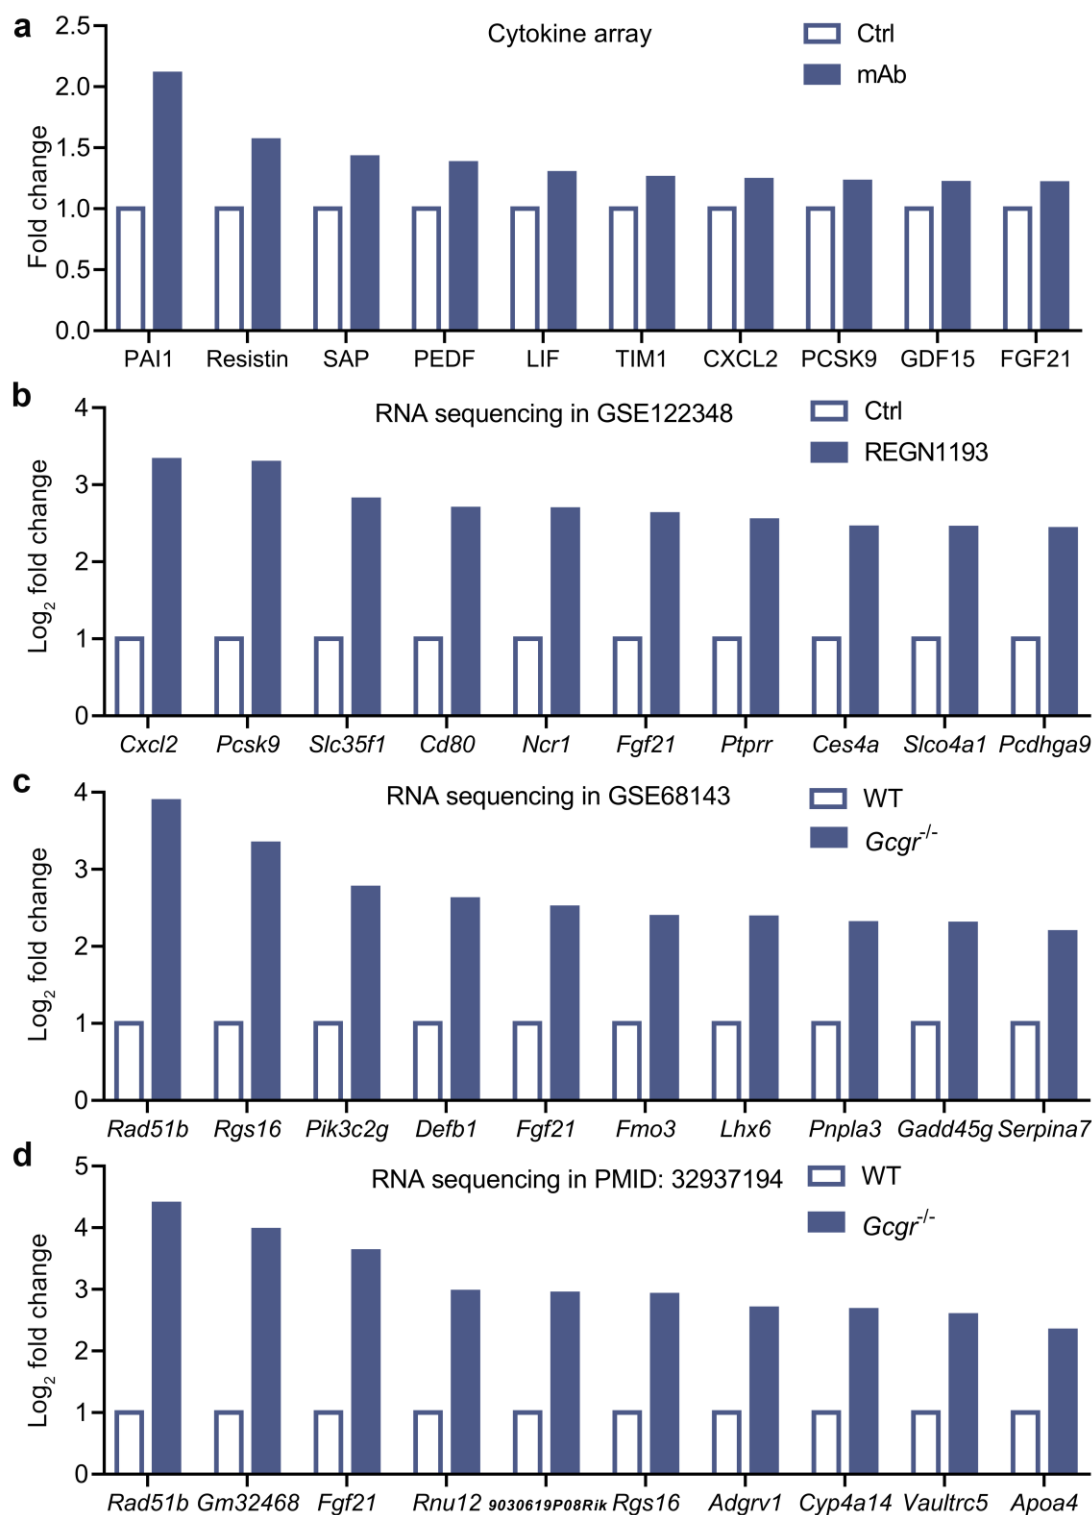

**ESM Fig. 2** Candidate protein or gene screening from the plasma cytokine array or liver RNA sequencing data in the GCGR antagonistic and control mice. **(a)** The fold change of the top 10 upregulated proteins in the GCGR mAb- and human IgG control-treated STZ-

induced diabetic mice in our cytokine array screening. **(b)** The log fold change of the top 10 upregulated genes in the GCGR antagonist REGN1193-treated mice and control mice. The original data were from GSE122348. **(c)** The log fold change of the top 10 upregulated genes in the *Gcgr*-knockout (*Gcgr*<sup>-/-</sup>) mice and wild-type (WT) mice. The original data were from GSE68143, and the data were permitted to be used by Prof. Lale Ozcan. **(d)** The log fold change of the top 10 upregulated genes in the *Gcgr*<sup>-/-</sup> mice and WT mice. The original data were from the published article (Winther-Sorensen M et al (2020) Mol Metab 42:101080. PMID 32937194), and the data were permitted to be used by Prof. Nicolai J. Wewer Albrechtsen. Ctrl, control group

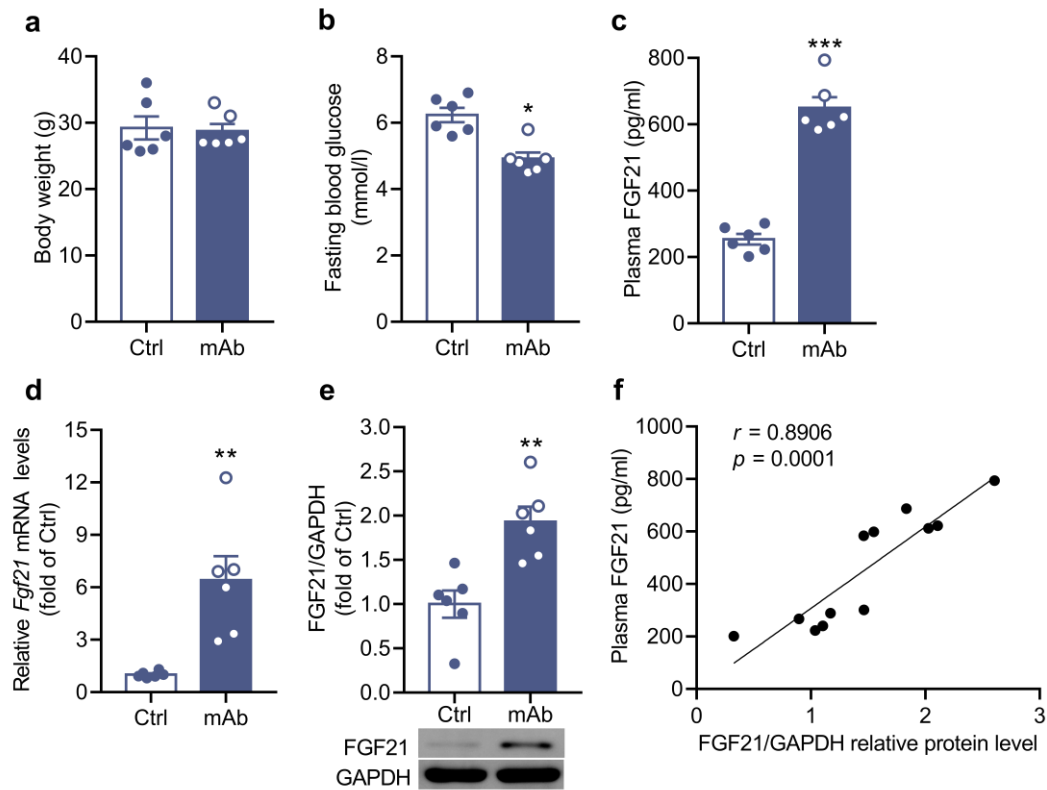

**ESM Fig. 3** Metabolic variables and FGF21 levels in non-diabetic C57BL6/N mice treated with GCGR mAb or human IgG control for 6 weeks. **(a)** Body weight. **(b)** Fasting blood glucose. **(c)** Fasting plasma FGF21. **(d)** Liver *Fgf21* mRNA levels. **(e)** Liver FGF21 protein levels. **(f)** Correlation of plasma FGF21 concentrations with hepatic FGF21 protein levels.  $n = 6$  mice per group. Data represent the mean  $\pm$  SEM. \* $P < 0.05$ , \*\* $P < 0.01$ , \*\*\* $P < 0.001$  vs control (Student's  $t$  test). Ctrl, control group

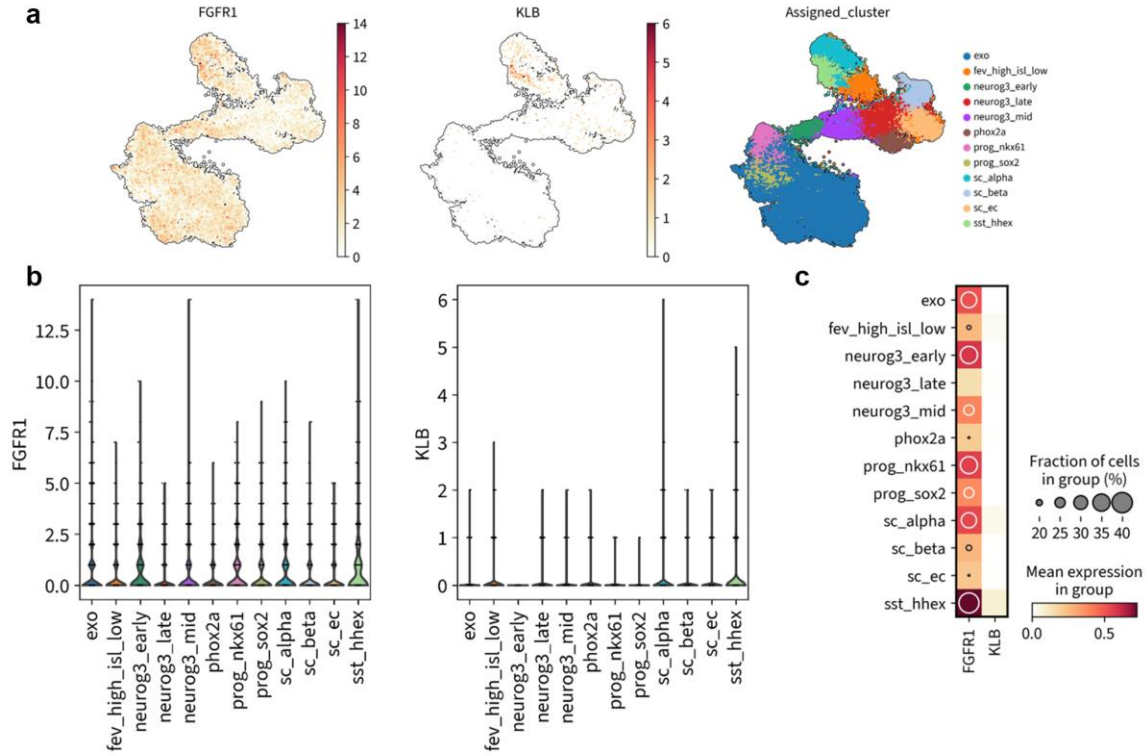

**ESM Fig. 4** Single-cell RNA sequencing analysis of *FGFR1* and  $\beta$ -*klotho* expression in the stage-5 of *in vitro* beta cell differentiation from human embryonic stem cells. **(a)** Expression of *FGFR1* and  $\beta$ -*klotho* (*KLB*) in each major cell type in stage-5 time-course data. **(b)** Expression of *FGFR1* and *KLB* in each major cell type in stage-5, shown as violin plots. **(c)** Gene expression of *FGFR1* and *KLB* for each subpopulation of major cell types. Shading displays mean expression (z-normalized TPM) and diameter denotes fractional expression. The original data were from GSE114412.

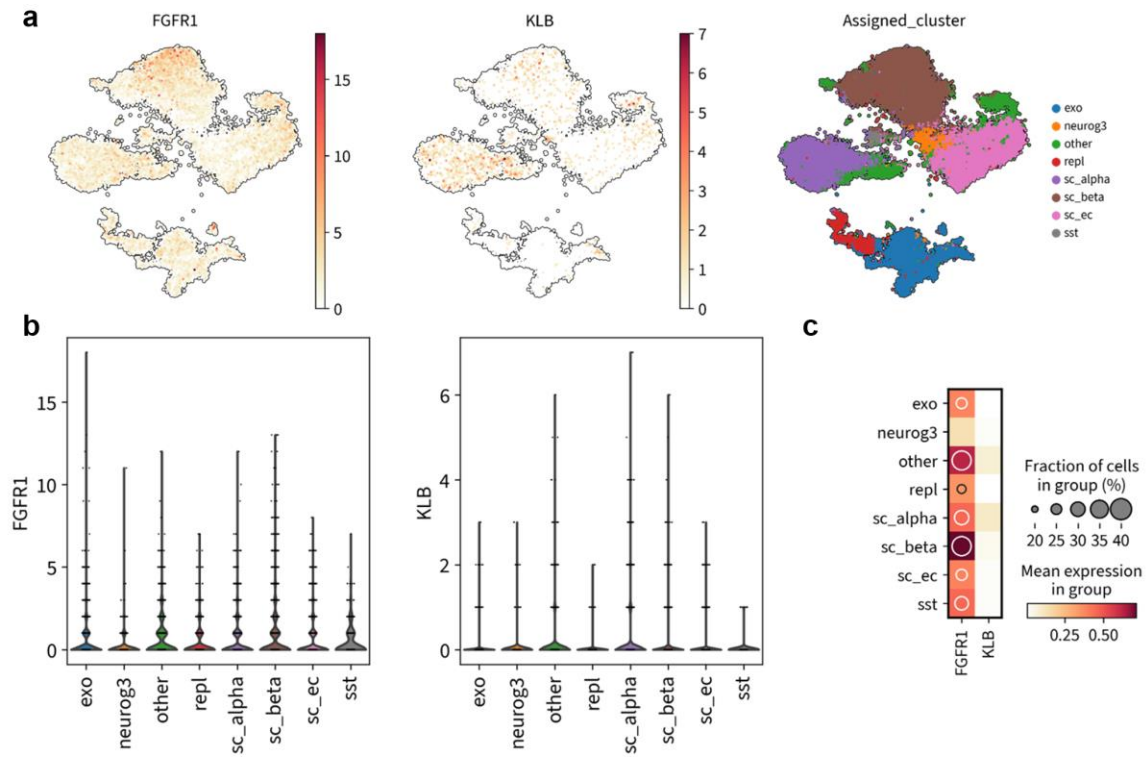

**ESM Fig. 5** Single-cell RNA sequencing analysis of *FGFR1* and  $\beta$ -*klotho* (*KLB*) expression in the stage-6 of *in vitro* beta cell differentiation from human embryonic stem cells. **(a)** Expression of *FGFR1* and  $\beta$ -*klotho* (*KLB*) in each major cell type in stage-6 time-course data. **(b)** Expression of *FGFR1* and *KLB* in each major cell type in stage-6, shown as violin plots. **(c)** Gene expression of *FGFR1* and *KLB* for each subpopulation of major cell types. Shading displays mean expression (z-normalized TPM) and diameter denotes fractional expression. The original data were from GSE114412.

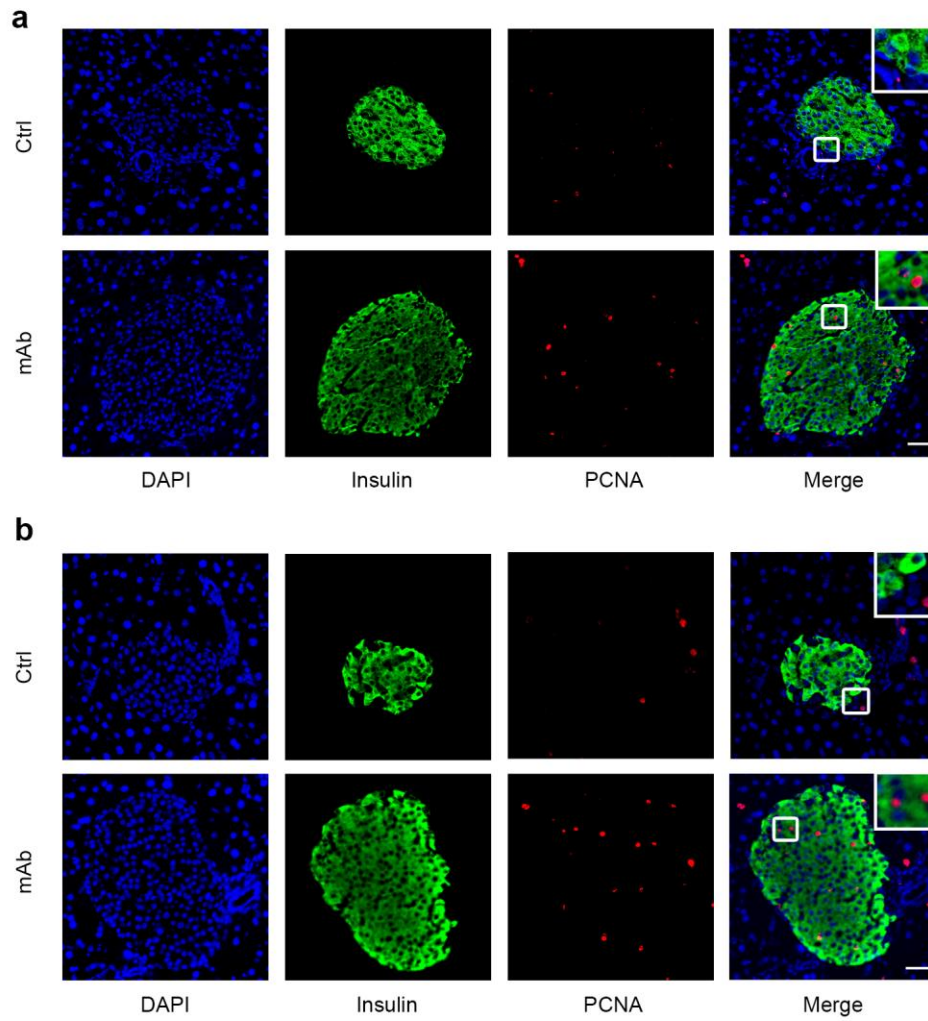

**ESM Fig. 6** Histological analysis of beta cell proliferation in the pancreatic tissues of two mouse models of type 2 diabetes treated with GCGR mAb or human IgG control for 6 weeks. **(a, b)** Representative photograph showing immunostaining of insulin and proliferating cell nuclear antigen (PCNA) in *db/db* mice **(a)** and HFD+STZ-induced mouse models of type 2 diabetes **(b)**. Enlarged images of small boxes are shown in the corner of images. Scale bar, 50  $\mu$ m.
